# Supplementary material
Source: publisher site journal article supplement (https://www.dovepress.com/article/223842)
Supplement: Supplementary file 1 [file get_supplementary_file.php]

**Supplementary Table 1.** The herbal composition and proportion of JMT

| <b>Drug name</b>           | <b>Scientific name</b>                      | <b>Chinese name</b> | <b>Voucher number</b> | <b>Dosage (g)</b> |
|----------------------------|---------------------------------------------|---------------------|-----------------------|-------------------|
| Semen Cuscutae             | <i>Cuscuta chinensis</i> Lam.               | Tu Sizi             | 2013201-1             | 10                |
| Fructus Ligustri lucidi    | <i>Ligustrum lucidum</i> Ait.               | Nv Zhenzi           | 2013179-2             | 10                |
| Herba Ecliptae             | <i>Eclipta prostrata</i> L.                 | Mo Hanlian          | 2013254-2             | 10                |
| Herba Prunella<br>vulgaris | <i>Prunella vulgaris</i> L.                 | Xia Kucao           | 2013331-1             | 10                |
| Semen Litchi               | <i>Litchi chinensis</i> Sonn.               | Li Zhihe            | 2013171-1             | 30                |
| Scorpio                    | <i>Buthus martensii</i> Karsch.             | Quan Xie            | 2013374-1             | 3                 |
| Ramulus Cinnamomi          | <i>Cinnamomum cassia</i><br>Presl.          | Gui Zhi             | 2013295-2             | 10                |
| Rhizoma Corydalis          | <i>Corydalis yanhusuo</i> w. T.             | Yan Husuo           | 2013725-1             | 10                |
| Semen Persicae             | <i>Prunus persica</i> L.                    | Tao Ren             | 2013200-2             | 10                |
| Semen Cassiae              | <i>Cassia obtuse folia</i> L.               | Jue Mingzi          | 2013164-2             | 30                |
| Radix et Rhizoma<br>Asari  | <i>Asarum heterotropiodes</i><br>F. Schmidt | Xi Xin              | 201399-2              | 3                 |
| Hirudo                     | <i>Whitmania pigra</i> Whitman              | Shui Zhi            | 2013380-1             | 3                 |

**Supplementary Table 2.** Detailed information of the antibodies used in this study

| <b>Name of antibody</b> | <b>Manufacture (Host)</b> | <b>Working dilution</b> | <b>Applications</b> |
|-------------------------|---------------------------|-------------------------|---------------------|
| TXNIP                   | abcam (Rabbit)            | 1:100                   | IHC                 |
| NLRP3                   | abcam ((Rabbit)           | 1:200                   | IHC                 |
| IL-1 $\beta$            | R&D (Goat)                | 1:150                   | IHC                 |
| TXNIP                   | abcam (Rabbit)            | 1:1000                  | WB                  |
| NLRP3                   | abcam (Rabbit)            | 1:1000                  | WB                  |
| Caspase-1               | abcam (Rabbit)            | 1:1000                  | WB                  |
| IL-1 $\beta$            | Santa Cruz (Mouse)        | 1:1000                  | WB                  |
| GSDMDC1                 | Santa Cruz (Mouse)        | 1:500                   | WB                  |
| $\beta$ -actin          | Santa Cruz (Mouse)        | 1:1000                  | WB                  |

**Abbreviations:** IHC, Immunohistochemistry; WB, Western Blot.
